# Supplementary material
Source: PubMed Central journal article supplement (PMC3401628)
Supplement: NIHMS337945-supplement-Supp_Data_revised.pdf [file NIHMS337945-supplement-Supp_Data_revised.pdf]

**Supp. Table S1. Primers used to sequence *VAX1* and *VAX2* genes**

| <b>VAX1 long isoform<br/>NM_001112704.1</b> | <b>Forward primer</b> | <b>Reverse primer</b> |
|---------------------------------------------|-----------------------|-----------------------|
| Exon 1                                      | ggttttgtccccttttct    | gccaacaactttctccaag   |
| Exon 2                                      | gactgtgtcccaaatccag   | cccaaggtagttctgtcca   |
| Exon 3 (1)                                  | tcctttgacgctggcttc    | ctaagcgcgtgagtcata    |
| Exon 3 (2A)                                 | tcctttgacgctggcttc    | aggctgaagaggctgtgg    |
| Exon 3 (2B)                                 | cgtgtacggctgctgg      | cccgaatgagatgaaattgg  |
| <b>VAX1 short isoform<br/>NM_199131.2</b>   |                       |                       |
| Exon 3                                      | tctgaagcaagcgaaaaaca  | tcgagagcgaaacactcaag  |
| <b>VAX2<br/>NM_012476.2</b>                 |                       |                       |
| Exon 1                                      | cctgaggaggaggagtcgag  | tgctgaatgaatgactggatg |
| Exon 2                                      | gtcacaggctcatgcaaccag | gcctcatatcccaggagtt   |
| Exon 3                                      | ctccttctcctcccact     | gcctgctcagtgtgtcc     |
| <b>TCF7L2</b>                               |                       |                       |
| Exon 1b                                     | gccgcaaccctctctagatc  | cgctggctggtaagtgtgg   |
| Exon 5                                      | gacaagccctcaaggatgcc  | cgctggctggtaagtgtgg   |

We used two separate sets of primers for exon 3 of the *VAX1* long isoform – pair (1), in which the entire exon is amplified and pair (2A) and (2B) in which the exon is amplified in two fragments.

**Supp. Table S2. Conservation of Arginine residue 152 amongst different species for VAX1 isoform 1**

|                               |   |   |   |   |   |   |   |   |   |   |   |   |          |   |   |   |   |   |   |   |   |   |   |   |   |
|-------------------------------|---|---|---|---|---|---|---|---|---|---|---|---|----------|---|---|---|---|---|---|---|---|---|---|---|---|
| <i>Homo sapiens</i>           | S | E | T | Q | V | K | V | W | F | Q | N | R | <b>R</b> | T | K | Q | K | K | D | Q | G | K | D | S | E |
| <i>Mus musculus</i>           | . | . | . | . | . | . | . | . | . | . | . | . | .        | . | . | . | . | . | . | . | . | . | . | . | . |
| <i>Rattus norvegicus</i>      | . | . | . | . | . | . | . | . | . | . | . | . | .        | . | . | . | . | . | . | . | . | . | . | . | . |
| <i>Pan troglodytes</i>        | . | . | . | . | . | . | . | . | . | . | . | . | .        | . | . | . | . | . | . | . | . | . | . | . | . |
| <i>Bos taurus</i>             | . | . | . | . | . | . | . | . | . | . | . | . | .        | . | . | . | . | . | . | . | . | . | . | . | . |
| <i>Canis lupus familiaris</i> | . | . | . | . | . | . | . | . | . | . | . | . | .        | . | . | . | . | . | . | . | . | . | . | . | . |
| <i>Monodelphis domestica</i>  | . | . | . | . | . | . | . | . | . | . | . | . | .        | . | . | . | . | . | . | . | . | . | . | . | . |
| <i>Gallus gallus</i>          | . | . | . | . | . | . | . | . | . | . | . | . | .        | . | . | . | . | . | . | . | . | . | . | . | . |
| <i>Danio rerio</i>            | . | . | . | . | . | . | . | . | . | . | . | . | .        | . | . | . | . | . | . | . | . | . | . | . | . |
| <i>Xenopus laevis</i>         | . | . | . | . | . | . | . | . | . | . | . | . | .        | . | . | . | . | . | . | . | . | . | . | . | . |
| <i>Taeniopygia guttata</i>    | . | . | . | . | . | . | . | . | . | . | . | . | .        | . | . | . | . | . | . | . | . | . | . | . | . |
| <i>Caenorhabditis elegans</i> | D | . | Y | . | . | . | I | . | . | . | . | . | .        | I | R | M | R | R | E | A | N | K | - | - | - |
| <i>Nematostella vectensis</i> | . | . | R | . | . | . | . | . | . | . | . | . | .        | M | K | Y | K | R | E | R | - | - | - | - | - |

The arginine residue at position 152 is in bold and is conserved in all species listed. Identical amino acids that are conserved are represented with a “.”

**Supp. Table S3. Phenotype of Anophthalmia/Microphthalmia (A/M) Patients Selected for Cleft Lip +/- Palate and Agenesis of the Corpus Callosum**

| Phenotype                                                                                                                          | (1)          | (2)                      | (3)           | (4)             | (5)                | (6)                                | (7)                        | (8)                           | (9)            | (10)            |
|------------------------------------------------------------------------------------------------------------------------------------|--------------|--------------------------|---------------|-----------------|--------------------|------------------------------------|----------------------------|-------------------------------|----------------|-----------------|
| <u>Ocular</u><br>A/M<br>Coloboma<br>Other                                                                                          | +; B         | +; B                     | +; B          | +; L<br>+; R    | +; B<br>+; B       | +; R<br>+; R eyelid                | +; B<br>+; R<br>Anisocoria | +; R                          | +; B           | +; B<br>+; R/?L |
| <u>Orofacial clefting</u><br>Cleft palate<br>Cleft lip                                                                             | +; B<br>+; B | +; B<br>+; B             | +; B.<br>+; B | -<br>-          | +; R<br>+; R       | +; R<br>+; R                       | +; B<br>+; R               | +; B<br>+; B                  |                | +; submuc.      |
| <u>Central nervous system</u><br>Agenesis corpus callosum<br>Developmental delay<br>Seizures<br>NTD/Encephalocele<br>Hydrocephalus |              |                          |               | +; compl.<br>+  | +; partial         |                                    |                            |                               | +; compl.<br>+ | +; ?partial     |
| <u>Other</u><br>Craniofacial dysmorphism<br>Cardiac anomalies<br>Genitourinary anomalies<br>Skeletal abnormalities                 |              | ASD<br>Renal hyp.<br>SBO | +<br>HLH      | +<br>Renal dup. | +                  | +<br>VSD                           | +<br>PDA<br>Hypogonad      |                               | +<br>+; Amp.   | +<br>+<br>+     |
| Clinical diagnosis                                                                                                                 |              |                          |               |                 | CHARGE<br>syndrome | Goldenhar/<br>Treacher-<br>Collins |                            | Amniotic<br>bands<br>syndrome |                |                 |
| <i>VAX1</i> sequence alteration                                                                                                    | c.945C>T     | Nil                      | Nil           | Nil             | Nil                | Nil                                | Nil                        | Nil                           | Nil            | Nil             |

Nucleotide numbering reflects cDNA numbering with +1 corresponding to the A of the ATG translation initiation codon in the reference sequence, according to journal guidelines ([www.hgvs.org/mutnomen](http://www.hgvs.org/mutnomen)) for both genes. The initiation codon is codon 1.

A/M = anophthalmia/microphthalmia; B = bilateral; L = left; R = right; Submuc. = submucous; compl. = complete; NTD = neural tube defect; ASD = atrial septal defect; HLH = hypoplastic left heart; VSD = ventricular septal defect; PDA = patent ductus arteriosus; Renal hyp. = renal hypoplasia (unilateral); Renal dup. = duplicated kidney; Hypogonad. = hypogonadism; SBO = spina bifida occulta; Amp. = amputation defect.
